# Supplementary material for: Antiviral Activity of Vacuolar ATPase Blocker Diphyllin against SARS-CoV-2
Source: MDPI journal article supplement (doi:10.3390/microorganisms9030471), 2021-02-25
Supplement: s1 [file s1]

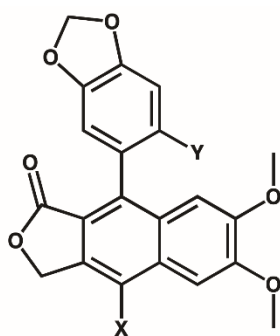

**justicidin A**; X = OMe, Y = H  
**justicidin B**; X = H, Y = H

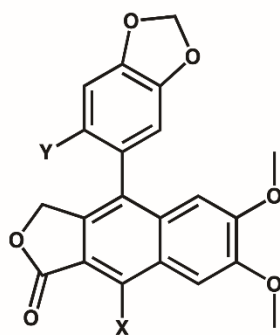

**justicidin C**; X = OMe, Y = H

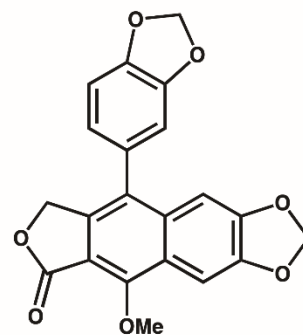

**justicidin D**

**justicidin B**; X = OMe, Y = Glc  
**justicidin C**; X = H, Y = Glc

**justicidin A**; X = OMe, Y = Glc

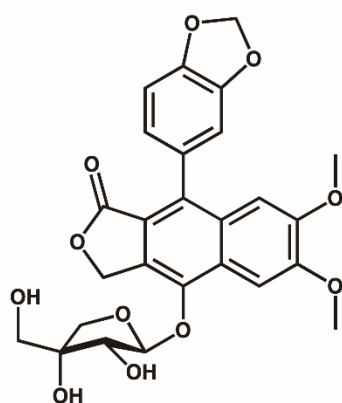

**diphyllin apioside**

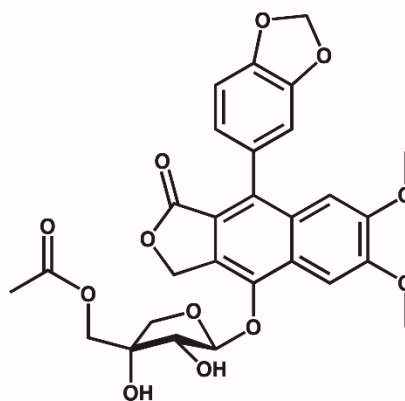

**diphyllin apioside-acetate**

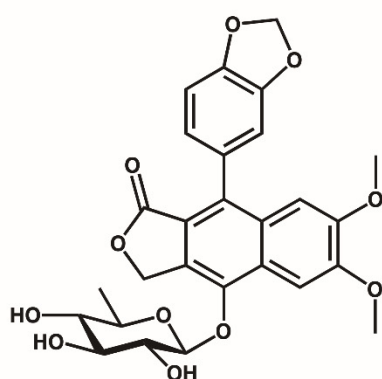

**patentiflorin A**

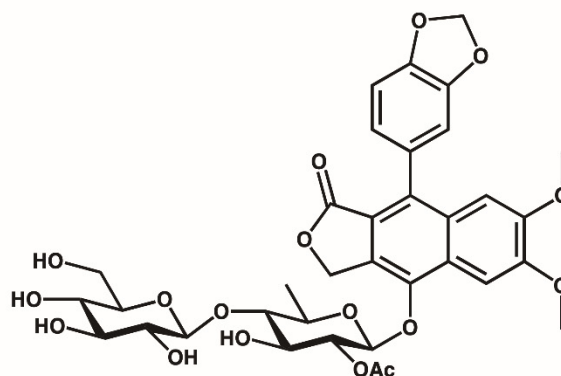

**justiprocumin B**

**Figure S1.** Structures of diphyllin analogues and diphyllinosides.
